# Supplementary material for: A polyoxotungstate/W18O49 nanocomposite with a bird-nest-like network supports high-performance electrochromic supercapacitors
Source: Royal Society of Chemistry journal article supplement (doi:10.1039/d4nr03958k), 2025-01-01
Supplement: d4nr03958k1.pdf [file d4nr03958k1.pdf]

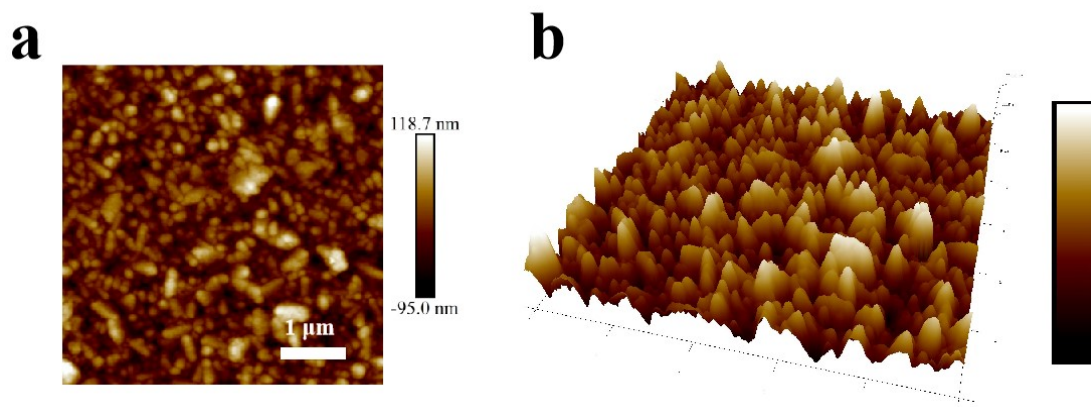

**Fig. S1.** (a, b) AFM images of the [PEI/P<sub>2</sub>W<sub>18</sub>]<sub>20</sub> film for 3D and 2D images.

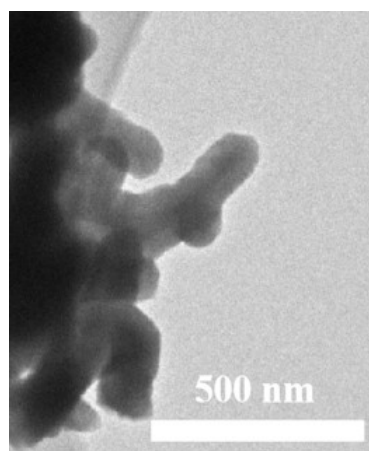

**Fig. S2.** The TEM image of the W<sub>18</sub>O<sub>49</sub>/[PEI/P<sub>2</sub>W<sub>18</sub>]<sub>20</sub> film after 500 stability cycles.

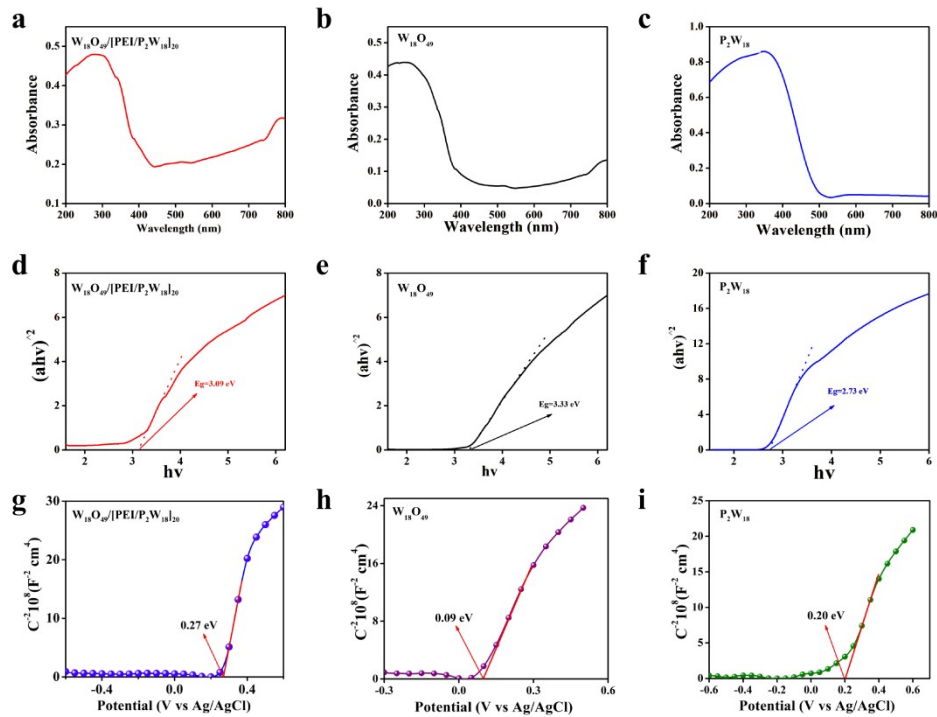

**Fig S3.** (a-c) UV-VIS diffuse reflectance spectra of the  $W_{18}O_{49}/[PEI/P_2W_{18}]_{20}$ ,  $W_{18}O_{49}$  and  $P_2W_{18}$  film. (d-f) Calculated band gaps of the  $W_{18}O_{49}/[PEI/P_2W_{18}]_{20}$ ,  $W_{18}O_{49}$  and  $P_2W_{18}$  film after converting the spectra to the Kubelka-Munk plot. Mott-Schottky plots of the (g)  $W_{18}O_{49}/[PEI/P_2W_{18}]_{20}$  film, (h)  $W_{18}O_{49}$  film and (i)  $P_2W_{18}$  film.

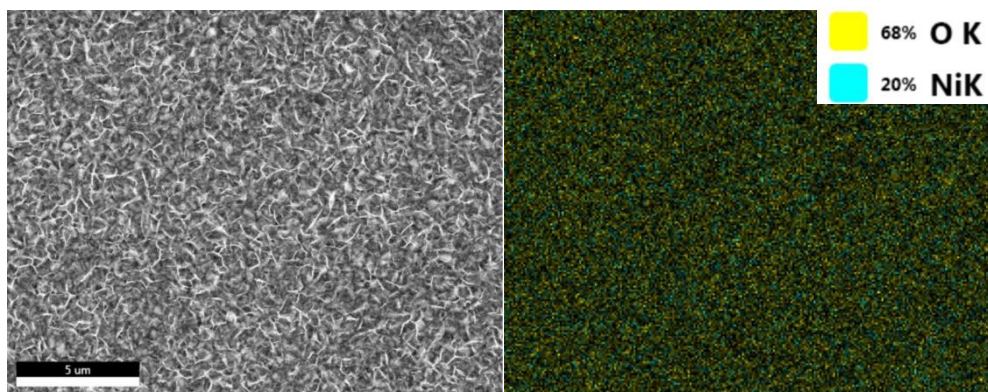

**Fig. S4.** SEM diagram of NiO and corresponding EDS diagram.

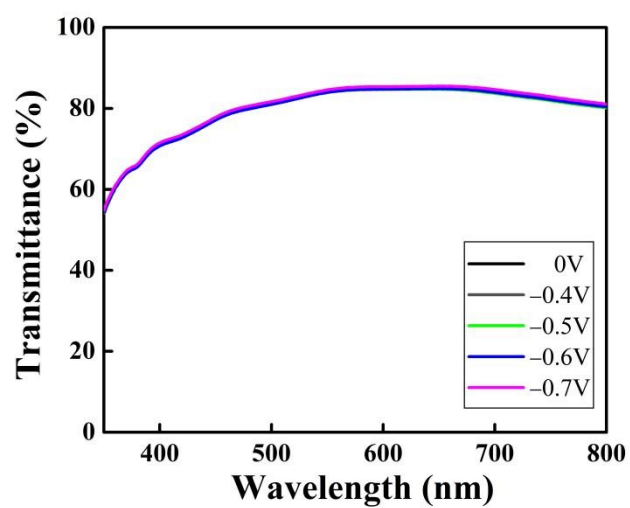

**Fig. S5.** The transmittance curve of NiO film at 0 V, - 0.4 V ~ - 0.7 V in the wavelength range of 350–800 nm.

Table S1 Comparison of electrochromic and energy storage performance in this work and previous works about POMs-based and inorganic metal oxides electrodes.

| EC material                                                                     | Specific capacitance            | Coloration efficiency<br>(cm <sup>2</sup> /C) | Transmittance contrast             | Switching speed<br>(color / bleach (s)) | Ref.             |
|---------------------------------------------------------------------------------|---------------------------------|-----------------------------------------------|------------------------------------|-----------------------------------------|------------------|
| <b>WO<sub>2.72</sub>/P<sub>2</sub>W<sub>18</sub></b>                            | <b>30.45 mF cm<sup>-2</sup></b> | <b>224.15</b>                                 | <b>ΔA = 2.00 at 650 nm</b>         | <b>3.92/0.75</b>                        | <b>This work</b> |
| WO <sub>3-x</sub><br>(amorphous)                                                | -                               | 125–80                                        | 56–70% at 550–800 nm               | 5 s/2.5 s                               | 1–4              |
| WO <sub>2.72</sub> assembled<br>on Ag nanowires                                 | -                               | 35.7                                          | 58–86% at 550 nm                   | 2 s/4 s                                 | 5                |
| WO <sub>2.72</sub> /P <sub>8</sub> W <sub>48</sub>                              | -                               | 42.31                                         | 64% at 630 nm and 88%<br>at 915 nm | 26/86                                   | 6                |
| MoO <sub>3</sub> -<br>WO <sub>3</sub> /Ag/MoO <sub>3</sub> -<br>WO <sub>3</sub> | -                               | 70                                            | 72.9 – 79.3 at 400 – 800<br>nm     | 2.7/4.1                                 | 7                |
| W <sub>2.72</sub> nanowire                                                      | -                               | 82.1                                          | 68.7% at 633 nm                    | 2.3/1.4                                 | 8                |
| NW-P <sub>2</sub> W <sub>18</sub>                                               | -                               | 69.0                                          | 45.1 at 650 nm                     | 1.9/6.7                                 | 9                |
| WO <sub>3</sub> -V <sub>2</sub> O <sub>5</sub>                                  | 38.75 mF cm <sup>-2</sup>       | 61.5                                          | 60 at 700 nm                       | 4.9/0.61                                | 10               |
| Ag NWs/WO <sub>3</sub>                                                          | 13.6 mF cm <sup>-2</sup>        | 80.2                                          | 44.1 at 633 nm                     | 1.7/1.0                                 | 11               |
| h-WO <sub>3</sub> /TiO <sub>2</sub><br>NRAs                                     | 10.93 mF cm <sup>-2</sup>       | 69.2                                          | 73.45 at 633 nm                    | 6.6/2.0                                 | 12               |
| TiO <sub>2</sub> PANI                                                           | 3.6 mF cm <sup>-2</sup>         | 78                                            | 76.9 at 600 nm                     | 3.6/3.3                                 | 13               |
| P <sub>5</sub> W <sub>30</sub> /PAH-<br>Fe(phen) <sub>3</sub>                   | 10.45 mF cm <sup>-2</sup>       | 94.73                                         | 35.17 at 650 nm                    | 2.49/0.9                                | 14               |
| NW/P <sub>2</sub> W <sub>17</sub> /Fe(phen) <sub>3</sub>                        | 135.8 F cm <sup>-3</sup>        | 194.5                                         | 34.3 at 600 nm                     | 2.8/6.2                                 | 15               |
| Hybrid WO <sub>3</sub><br>nanoarrays                                            | 47.4 mF cm <sup>-2</sup>        | 92.3                                          | -                                  | 3.0/3.6                                 | 16               |

- [1] C. Guille'n and J. Herrero, *J. Mater. Sci. Technol.*, 2021, 78, 223–228.
- [2] H. Yu, J. Guo, C. Wang, J. Zhang, J. Liu, X. Zhong, G. Dong and X. Diao, *Electrochim. Acta*, 2019, 318, 644–650.
- [3] R. Baetens, B. P. Jelle and A. Gustavsen, *Sol. Energy Mater. Sol. Cells*, 2010, 94, 87–105.
- [4] T. V. Nguyen, K. A. Huynh, Q. V. Le, H. Kim, S. H. Ahn and S. Y. Kim, *Int. J. Energy Res.*, 2021, 45, 8061–8072.
- [5] J. Wang, Y. Lu, H. Li, J. Liu and S. Yu, *J. Am. Chem. Soc.*, 2017, 139, 9921–9926.
- [6] H. Gu, C. Guo, S. Zhang, L. Bi, T. Li, T. Sun and S. Liu, *ACS Nano*, 2018, 12, 559–567.
- [7] W. Dong, Y. Lv, L. Xiao, Y. Fan, N. Zhang and X. Liu, *ACS Appl. Mater. Interfaces*, 2016, 8, 33842–33847.
- [8] J. L. Xie, B. Song, G. L. Zhao and G. R. Han, *Appl. Phys. Lett.* 2018, 112, 231902.
- [9] S. P. Liu, X. S. Qu, *Appl. Surf. Sci.* 2017, 184, 129–195.

- [10] A. K. Prasad, J. Y. Park, S. H. Kang, K. S. Ahn, *Electrochim. Acta.* 2022, 422, 140340.
- [11] L.X. Shen, L.H. Du, S.Z. Tan, Z.G. Zang, C.X. Zhao, W.J. Mai, *Chem. Commun.* 52 (2016) 6296–6299.
- [12] L.L. Zhao, X.H. Huang, G.H. Lin, Y.Q. Peng, J. Chao, L.Z. Yi, X.X. Huang, C. Li, W.B. Liao, *Chem. Eng. J.* 420 (2021) 129871.
- [13] S.Y. Zhang, P.Y. Lei, J.J. Fu, X.R. Tong, Z.P. Wang, G.F. Cai, *Appl. Surf. Sci.* 607 (2023) 155015.
- [14] S. P. Liu, J. Zhang, Y. Y. Song, S. Y. Feng, Y. Y. Yang, X. S. Qu, *Eur. J. of Inorg. Chem.* 2022, e202200543.
- [15] D. X. Chu, X. S. Qu, S. F. Zhang, J. R. Zhang, Y. Y. Yang, W. J. An, *New J. Chem.* 2021, 45, 19977–19985.
- [16] Y. D. Shi, M. J. Sun, Y. Zhang, J. W. Cui, Y. Q. Wu, H. H. Ta, J. Q. Liu and Y. C. Wu, *Sol. Energy Mater. Sol. Cells.* 2020, 212, 110579.
